# Supplementary material
Source: PubMed Central journal article supplement (PMC6493979)

**Supplemental Table 1. Clinical features of three patients in a non-consanguineous Chinese family with steroid-resistant nephrotic syndrome**

| Family-Individual | Gender | Age of onset (yrs) | Urinary protein (g/24h) | Extrarenal manifestations | Biopsy | Renal phenotype and therapy (ESRD at yrs) | Transplantation (yrs)/Death (yrs)   |
|-------------------|--------|--------------------|-------------------------|---------------------------|--------|-------------------------------------------|-------------------------------------|
| II2               | F      | N/A                | 3+ (N/A)                | No                        | N/A    | SRNS, ESRD (N/A)                          | Death (17) <sup>1</sup>             |
| II3               | M      | 14                 | 3+ (6.20)               | No                        | N/A    | SRNS, ESRD (16)                           | Death (17) <sup>2</sup>             |
| II6               | F      | 7                  | 3+ (8.34)               | No                        | FSGS   | SRNS, ESRD (15)                           | Transplantation (16.4) <sup>3</sup> |

ESRD, end-stage renal disease; F, female; FSGS, focal segmental glomerulosclerosis; M, male; N/A, no applicable; SRNS, steroid-resistant nephrotic syndrome; yrs, years. 1- Patient II2 died in 1993; 2 - Patient II3 died in 1998. 3 - Patient II6 keeps a normal renal function after transplantation performed in 2005.

**Supplemental Table 2. A list of known genes associated with steroid-resistant nephrotic syndrome**

| Gene            | Inheritance                     | Disease                                                                                                                                        | Histology                               |
|-----------------|---------------------------------|------------------------------------------------------------------------------------------------------------------------------------------------|-----------------------------------------|
| <i>ACTN4</i>    | AD                              | SRNS (late onset)                                                                                                                              | FSGS                                    |
| <i>ADCK4</i>    | AR                              | CoQ10 biosynthesis disruption, SRNS                                                                                                            | FSGS                                    |
| <i>ALG1</i>     | AR                              | Congenital defect of glycosylation                                                                                                             | FSGS                                    |
| <i>ANLN</i>     | AD                              | SRNS (adult-onset)                                                                                                                             | FSGS                                    |
| <i>APOL1</i>    | Biallelic (G1, G2 risk alleles) | Increased susceptibility to FSGS and ESRD in African Americans, Hispanic Americans and in individuals of African descent                       | FSGS                                    |
| <i>ARHGAP24</i> | AD                              | FSGS (adult-onset)                                                                                                                             | FSGS                                    |
| <i>ARHGDI1</i>  | AR                              | SRNS (CNS), seizures, cortical blindness                                                                                                       | FSGS                                    |
| <i>AVIL</i>     | AR                              | SRNS                                                                                                                                           | DMS                                     |
| <i>CD151</i>    | AR                              | ESRD, pretibial bullous skin lesions, sensorineural deafness, bilateral lacrimal duct stenosis, nail dystrophy, and $\beta$ -thalassemia minor | FSGS                                    |
| <i>CD2AP</i>    | AD, AR                          | SRNS                                                                                                                                           | FSGS                                    |
| <i>CFH</i>      | AR                              | MPGN type II + NS                                                                                                                              | FSGS                                    |
| <i>COL4A3</i>   | AD, AR                          | Alport syndrome                                                                                                                                | FSGS                                    |
| <i>COL4A4</i>   | AD, AR                          | Alport syndrome                                                                                                                                | FSGS                                    |
| <i>COL4A5</i>   | XLD                             | Alport syndrome                                                                                                                                | FSGS                                    |
| <i>COQ2</i>     | AR                              | CoQ10 deficiency, SRNS +/-encephalopathy                                                                                                       | CG                                      |
| <i>COQ6</i>     | AR                              | CoQ10 deficiency, SRNS and deafness                                                                                                            | FSGS, DMS                               |
| <i>CRB2</i>     | AR                              | SRNS                                                                                                                                           | FSGS                                    |
| <i>CUBN</i>     | AR                              | Intermittent nephrotic range proteinuria +/- with epilepsy                                                                                     | FSGS                                    |
| <i>DGKE</i>     | AR                              | Hemolytic-Uremic Syndrome + SRNS                                                                                                               | FSGS                                    |
| <i>E2F3</i>     | AD                              | FSGS, mental retardation (gene deletion)                                                                                                       | FSGS                                    |
| <i>EMP2</i>     | AR                              | SRNS and SSNS (childhood-onset )                                                                                                               | FSGS                                    |
| <i>FAT1</i>     | AR                              | SRNS, tubulopathy, neurological involvement                                                                                                    | glomerulotubular nephropathy (variable) |
| <i>GPC5</i>     | Risk gene                       | NS (adult-onset)                                                                                                                               | Variable                                |
| <i>INF2</i>     | AD                              | SRNS, FSGS-associated Charcot-Marie-Tooth neuropathy                                                                                           | FSGS                                    |
| <i>ITGA3</i>    | AR                              | Congenital interstitial lung disease, SRNS, and mild epidermolysis bullosa                                                                     | FSGS                                    |

|               |              |                                                                                                                                                                                                                  |                               |
|---------------|--------------|------------------------------------------------------------------------------------------------------------------------------------------------------------------------------------------------------------------|-------------------------------|
| <i>ITGB4</i>  | AR           | Epidermolysis bullosa and pyloric atresia , FSGS                                                                                                                                                                 | FSGS                          |
| <i>KANK1</i>  | AR           | SSNS                                                                                                                                                                                                             | MCD                           |
| <i>KANK2</i>  | AR           | SSNS/SDNS +/- hematuria                                                                                                                                                                                          | MCD                           |
| <i>KANK4</i>  | AR           | SRNS + haematuria                                                                                                                                                                                                | FSGS                          |
| <i>LAMA5</i>  | AR           | Partially treatment-responsive NS (childhood-onset) with homozygous variants of unknown significance                                                                                                             | FSGS                          |
| <i>LAMB2</i>  | AR           | Pierson syndrome                                                                                                                                                                                                 | DMS, FSGS                     |
| <i>LMNA</i>   | AD           | Familial partial lipodystrophy, FSGS                                                                                                                                                                             | FSGS                          |
| <i>LMX1B</i>  | AD           | Nail-patella syndrome; isolated SRNS                                                                                                                                                                             | FSGS                          |
| <i>MAGI2</i>  | AR           | CNS, SRNS                                                                                                                                                                                                        | MCD                           |
| <i>MTTL1</i>  | Mitochondria | MELAS, diabetes, deafness, SRNS                                                                                                                                                                                  | FSGS                          |
| <i>MYH9</i>   | AD           | MYH9-related disease, Epstein and Fechtner syndromes, SRNS                                                                                                                                                       | FSGS                          |
| <i>MYO1E</i>  | AR           | Familial SRNS                                                                                                                                                                                                    | FSGS                          |
| <i>NUP85</i>  | AR           | SRNS, microscopic hematuria, +/- short stature, intellectual disability, partial growth hormone deficiency                                                                                                       | FSGS                          |
| <i>NUP93</i>  | AR           | Childhood SRNS                                                                                                                                                                                                   | FSGS, DMS                     |
| <i>NUP107</i> | AR           | Childhood SRNS, +/- microscopic hematuria, dilated cardiomyopathy, arterial hypertension, microcephaly, developmental delay, intellectual disability, short stature, facial dysmorphism, cleft lip, cleft palate | FSGS, DMS, Glomerulosclerosis |
| <i>NUP133</i> | AR           | Childhood SRNS                                                                                                                                                                                                   | FSGS                          |
| <i>NUP205</i> | AR           | Childhood SRNS                                                                                                                                                                                                   | FSGS                          |
| <i>NPHS1</i>  | AR           | Congenital nephrotic syndrome/SRNS                                                                                                                                                                               | PTRD, PMS, FSGS, MCD          |
| <i>NPHS2</i>  | AR           | CNS, SRNS                                                                                                                                                                                                        | FSGS, MCD                     |
| <i>NXF5</i>   | XLR          | FSGS with co-segregating heart block disorder                                                                                                                                                                    | FSGS                          |
| <i>OCRL1</i>  | XLR          | Dent disease, Lowe syndrome, +/- FSGS, +/- nephrotic range proteinuria                                                                                                                                           | FSGS                          |
| <i>PAX2</i>   | AD           | FSGS (adult-onset ) without extrarenal manifestations                                                                                                                                                            | FSGS                          |
| <i>PDSS2</i>  | AR           | CoQ10 deficiency, SRNS, Leigh syndrome                                                                                                                                                                           | FSGS                          |
| <i>PLCE1</i>  | AR           | CNS, SRNS (early onset)                                                                                                                                                                                          | DMS, FSGS                     |
| <i>PMM2</i>   | AR           | Congenital disorder of glycosylation                                                                                                                                                                             | CG                            |
| <i>PODXL</i>  | AD           | FSGS                                                                                                                                                                                                             | FSGS                          |

|                 |         |                                                                     |           |
|-----------------|---------|---------------------------------------------------------------------|-----------|
| <i>PTPRO</i>    | AR      | SRNS (childhood-onset)                                              | FSGS, MCD |
| <i>SCARB2</i>   | AR      | Action myoclonus renal failure syndrome +/- hearing loss            | FSGS      |
| <i>SGPL1</i>    | AR      | nephrosis (SRNS) with ichthyosis and adrenal insufficiency          | FSGS      |
| <i>SMARCAL1</i> | AR      | Schimke immuno-osseous dysplasia                                    | FSGS      |
| <i>SYNPO</i>    | AD      | Sporadic FSGS (promoter mutations)                                  | FSGS      |
| <i>TRPC6</i>    | AD      | SRNS (late onset)                                                   | FSGS      |
| <i>TTC21B</i>   | AR      | FSGS with tubulointerstitial involvement                            | FSGS      |
| <i>WDR73</i>    | AR      | Galloway-Mowat syndrome (microcephaly and SRNS)                     | FSGS, DMS |
| <i>WT1</i>      | AD, Smu | Denys-Drash, Frasier syndrome, isolated SRNS +/- abnormal genitalia | FSGS, DMS |
| <i>XPO5</i>     | AR      | Childhood SRNS                                                      | MCD       |
| <i>ZMPSTE24</i> | AR      | Mandibuloacral dysplasia with FSGS                                  | FSGS      |

AD, Autosomal dominant; SRNS, steroid-resistant nephrotic syndrome; FSGS, focal segmental glomerulosclerosis; AR, autosomal recessive; ESRD, end-stage renal disease; CNS, congenital nephrotic syndrome; DMS, diffuse mesangial sclerosis; MPGN, membranoproliferative glomerulonephritis; NS, nephrotic syndrome; XLD, X-linked dominant; CG, collapsing glomerulopathy; SSNS, steroid-sensitive nephrotic syndrome; MCD, minimal change disease; SDNS, steroid-dependent nephrotic syndrome; MELAS, Mitochondrial encephalomyopathy, lactic acidosis, and stroke-like episodes; PMS, progressive mesangial sclerosis; PTRD, proximal tubule radial dilatation; XLR, X-linked recessive; Smu, Somatic mutation.

#### References:

1. Preston R, Stuart HM, Lennon R. Genetic testing in steroid-resistant nephrotic syndrome: why, who, when and how? *Pediatr Nephrol*. 2017 Nov 27. doi:10.1007/s00467-017-3838-6.
2. Bierzynska A, Soderquest K, Dean P, Colby E, Rollason R, Jones C, et al. MAGI2 Mutations Cause Congenital Nephrotic Syndrome. *J Am Soc Nephrol* 28: 1614-1621, 2017.
3. Rao J, Ashraf S, Tan W, van der Ven AT, Gee HY, et al. Advillin acts upstream of phospholipase C  $\epsilon$ 1 in steroid-resistant nephrotic syndrome. *J Clin Invest* 127: 4257-4269, 2017.
4. Gee HY, Sadowski CE, Aggarwal PK, Porath JD, Yakulov TA, Schueler M, et al. FAT1 mutations cause a glomerulotubular nephropathy. *Nat Commun* 7: 10822, 2016.
5. Braun DA, Warejko JK, Ashraf S, Tan W, Daga A, Schneider R, et al. Genetic variants in the LAMA5 gene in pediatric nephrotic syndrome. *Nephrol Dial Transplant*. 2018 Mar 9. doi:10.1093/ndt/gfy028.
6. Okamoto K, Tokunaga K, Doi K, Fujita T, Suzuki H, Katoh T, et al. Common variation in GPC5 is associated with acquired nephrotic syndrome. *Nat Genet* 43: 459-463, 2011.
7. Yasukawa T, Suzuki T, Ueda T, Ohta S, Watanabe K. Modification defect at anticodon wobble nucleotide of mitochondrial tRNAs(Leu)(UUR) with pathogenic mutations of mitochondrial myopathy, encephalopathy, lactic acidosis, and stroke-like episodes. *J Biol Chem* 275: 4251-4257, 2000.

8. Lovric S, Goncalves S, Gee HY, Oskouian B, Srinivas H, Choi WI, et al. Mutations in sphingosine-1-phosphate lyase cause nephrosis with ichthyosis and adrenal insufficiency. *J Clin Invest* 127: 912-928, 2017.
9. Prasad R, Hadjidemetriou I, Maharaj A, Meimaridou E, Buonocore F, Saleem M, et al. Sphingosine-1-phosphate lyase mutations cause primary adrenal insufficiency and steroid-resistant nephrotic syndrome. *J Clin Invest* 127: 942-953, 2017.
10. Braun DA, Lovric S, Schapiro D, Schneider R, Marquez J, Asif M, et al. Mutations in multiple components of the nuclear pore complex cause nephrotic syndrome. *J Clin Invest* 128: 4313-4328, 2018.

**Supplemental Table 3. Mapping statistics of whole exome sequencing**

|                                                                | <b>Patient<br/>(II6)</b> | <b>Sister<br/>(II5)</b> | <b>Father<br/>(I1)</b> | <b>Mother<br/>(I2)</b> | <b>Mean</b> | <b>Std.<br/>Error</b> |
|----------------------------------------------------------------|--------------------------|-------------------------|------------------------|------------------------|-------------|-----------------------|
| <b>Reads on target region (%)</b>                              | 84.10                    | 83.52                   | 84.99                  | 84.76                  | 84.34       | 0.33                  |
| <b>Reads mapped to target <math>\pm</math> 150bp (%)</b>       | 84.66                    | 84.09                   | 85.55                  | 85.31                  | 84.90       | 0.33                  |
| <b>Reads mapped to target <math>\pm</math> 500bp (%)</b>       | 85.41                    | 84.87                   | 86.28                  | 86.03                  | 85.65       | 0.32                  |
| <b>Mean depth in target region</b>                             | 125.38                   | 99.04                   | 109.73                 | 115.08                 | 112.31      | 5.49                  |
| <b>Covered target regions (%)</b>                              | 99.83                    | 99.82                   | 99.97                  | 99.82                  | 99.86       | 0.04                  |
| <b>Target base covered at least 1 <math>\times</math> (%)</b>  | 99.84                    | 99.82                   | 99.96                  | 99.83                  | 99.86       | 0.03                  |
| <b>Target base covered at least 5 <math>\times</math> (%)</b>  | 99.60                    | 99.52                   | 99.74                  | 99.56                  | 99.61       | 0.05                  |
| <b>Target base covered at least 10 <math>\times</math> (%)</b> | 99.20                    | 98.94                   | 99.31                  | 99.10                  | 99.14       | 0.08                  |
| <b>Target base covered at least 30 <math>\times</math> (%)</b> | 95.53                    | 92.73                   | 94.57                  | 94.66                  | 94.37       | 0.59                  |
| <b>Target base covered at least 50 <math>\times</math> (%)</b> | 87.02                    | 79.01                   | 83.55                  | 84.49                  | 83.52       | 1.67                  |

In Figure 1 C, I1 is Father, I2 is Mother, II5 is Sister, II6 is Patient.

Supplemental Table 4. Rare variants found in the patient (II6)

| gene and variant                                                         | dbSNP151    | DP_Sample | Nref_Sample | Nalt_Sample | Genotype Quality | Phred scaled variant quality | ExAC         |               |                       |             | Additional significant information <sup>1</sup>                                                                                                                                                                                                                                                                                                                                                                                                                                                                                                                                                                                                                                                                                                                                                                        |
|--------------------------------------------------------------------------|-------------|-----------|-------------|-------------|------------------|------------------------------|--------------|---------------|-----------------------|-------------|------------------------------------------------------------------------------------------------------------------------------------------------------------------------------------------------------------------------------------------------------------------------------------------------------------------------------------------------------------------------------------------------------------------------------------------------------------------------------------------------------------------------------------------------------------------------------------------------------------------------------------------------------------------------------------------------------------------------------------------------------------------------------------------------------------------------|
|                                                                          |             |           |             |             |                  |                              | Allele count | Allele Number | Number of homozygotes | Allele freq |                                                                                                                                                                                                                                                                                                                                                                                                                                                                                                                                                                                                                                                                                                                                                                                                                        |
| <i>TTC12</i> :<br>NM_017868:exon22:<br>c.G2071A:p.Gly691Ser (H)          | rs138333675 | 250       | 0           | 250         | 99               | 18393                        | 213          | 1E+05         | 5                     | 0.0018      | Polyphen: probably_damaging; SIFT: deleterious; PROVEAN: Deleterious; MutationTaster: disease causing. Father, Mother and Sister are heterozygous. The <i>TTC12</i> gene encodes TTC12 protein which is predicted to be localized to the nucleoplasm. TTC12 protein contains a tetratricopeptide repeat domain and 3 armadillo repeat domains. Expression of the <i>TTC12</i> gene in human cells in both glomeruli and tubules is low. Haplotypic variants in <i>TTC12</i> are associated with tobacco addiction (PMID: 17085484), comorbid alcohol and drug dependence (PMID: 18828801, PMID: 17761687), but 5 homozygous individuals with p.Gly691Ser in <i>TTC12</i> present no kidney phenotype.                                                                                                                  |
| <i>DCANP1 (C5orf20)</i> :<br>NM_130848:exon1:c.<br>G587A:p.Arg196His (H) | rs59567190  | 112       | 1           | 112         | 99               | 10111                        | 615          | 1E+05         | 23                    | 0.0051      | Polyphen: benign; SIFT: tolerated_low_confidence; PROVEAN: Deleterious; MutationTaster: polymorphism. Father, Mother and Sister are heterozygous. The intronless gene of <i>DCANP1</i> encodes DCANP1 protein which is predicted to be localized mainly in the perinucleus. DCANP1 protein is specifically expressed in dendritic cells (DCs). Expression of DCANP1 protein is not detected in neither cells in glomeruli nor cells in tubules. One of the alleles (AT) of this gene, that causes premature translation termination at aa 117, has been associated with an increased prevalence of major depression in humans (PMID:16189510). But 23 homozygous individuals with p.Arg196His in <i>DCANP1</i> present no kidney phenotype.                                                                            |
| <i>KIAA1549</i> :<br>NM_020910:exon16:<br>c.G5186A:p.Arg1729Lys (H)      | rs60797311  | 26        | 0           | 26          | 66               | 2071.8                       | 836          | 1E+05         | 45                    | 0.007       | Polyphen: benign; SIFT: deleterious; PROVEAN: Deleterious; MutationTaster: polymorphism. Father and Mother are heterozygous, and Sister is normal. The <i>KIAA1549</i> gene encodes KIAA1549 protein which is predicted to be mainly localized to the nuclear membrane and the intermediate filaments. KIAA1549 protein belongs to the UPF0606 family. Expression of the <i>KIAA1549</i> gene in human cells in both glomeruli and tubules is medium. This gene has been found to be fused to the <i>BRAF</i> oncogene in many cases of pilocytic astrocytoma (PMID: 18974108, PMID: 27608415). The fusion results from 2Mb tandem duplications at 7q34. Alternative splicing results in multiple transcript variants. But 45 homozygous individuals with p.Arg1729Lys in <i>KIAA1549</i> present no kidney phenotype. |

|                                                                          |                 |     |     |     |    |        |     |       |    |        |                                                                                                                                                                                                                                                                                                                                                                                                                                                                                                                                                                                                                                                                                                                                                                                                                                                                                                                                                                                                                                                                                                                                                                                      |
|--------------------------------------------------------------------------|-----------------|-----|-----|-----|----|--------|-----|-------|----|--------|--------------------------------------------------------------------------------------------------------------------------------------------------------------------------------------------------------------------------------------------------------------------------------------------------------------------------------------------------------------------------------------------------------------------------------------------------------------------------------------------------------------------------------------------------------------------------------------------------------------------------------------------------------------------------------------------------------------------------------------------------------------------------------------------------------------------------------------------------------------------------------------------------------------------------------------------------------------------------------------------------------------------------------------------------------------------------------------------------------------------------------------------------------------------------------------|
| <i>DNAH5</i> :<br>NM_001369:exon76:<br>c.G13286A:p.Arg442<br>9Gln (h)    | rs6174404<br>7  | 161 | 80  | 85  | 99 | 21546  | 586 | 1E+05 | 15 | 0.0048 | Polyphen: possibly_damaging; SIFT: N/A; PROVEAN: Deleterious; MutationTaster: disease causing (p.Arg4429Gln). Polyphen: benign; SIFT: N/A; PROVEAN: Deleterious; MutationTaster: disease causing (p.His4123Tyr). Father, Mother and Sister are heterozygous. The <i>DNAH5</i> gene encodes a dynein protein, which is part of a protein complexes composed of several heavy, light, and intermediate chains. The dynein heavy chains (DHCs) function as a force-generating protein with ATPase activity and contain a highly conserved catalytic domain with 4 P-loop consensus motifs involved in nucleotide binding. As a microtubule-associated motor protein, dynein expression is not detected in human cells of glomeruli and tubules. Mutations in the <i>DNAH5</i> gene cause primary ciliary dyskinesia type 3 (PMID: 23261302), as well as Kartagener syndrome (PMID: 11788826), which are both diseases due to ciliary defects.                                                                                                                                                                                                                                           |
| <i>DNAH5</i> :<br>NM_001369:exon72:<br>c.C12367T:p.His412<br>3Tyr (h)    | rs1511457<br>50 | 243 | 128 | 121 | 99 | 5984.3 | 85  | 1E+05 | 0  | 0.0007 |                                                                                                                                                                                                                                                                                                                                                                                                                                                                                                                                                                                                                                                                                                                                                                                                                                                                                                                                                                                                                                                                                                                                                                                      |
| <i>HYDIN</i> :<br>NM_001270974:exo<br>n56:c.G9319C:p.Gly<br>3107Arg (h)  | rs2007944<br>85 | 154 | 117 | 45  | 99 | 1534   | 255 | 1E+05 | 0  | 0.0021 | Polyphen: probably_damaging; SIFT: N/A; PROVEAN: Deleterious; MutationTaster: disease causing (p.Gly3107Arg). Polyphen: probably_damaging; SIFT: N/A; PROVEAN: Deleterious; MutationTaster: disease causing (p.Gly489Asp). Polyphen: probably_damaging; SIFT: N/A; PROVEAN: Neutral; MutationTaster: polymorphism (p.Val3899Met). p.Gly489Asp is from Father. Both p.Gly489Asp and p.Val3899Met are from Mother. Mother and Sister carry the same genotype. The <i>HYDIN</i> gene encodes HYDIN protein which is predicted to be localized to the plasma membrane and cytosol. Database and sequence analyses revealed HYDIN transcripts that had been isolated from lung, testis, NT2 neuronal precursor cells, and Jurkat leukemic T cells. But expression of HYDIN protein is not detected in human cells of glomeruli and tubules. HYDIN protein is involved in cilia motility. Mice homozygote with a mutation in <i>HYDIN</i> develops hydrocephaly after birth. Mutations in <i>HYDIN</i> cause of autosomal recessive primary ciliary dyskinesia-5 (PMID: 23022101), a disorder characterized by the accumulation of cerebrospinal fluid within the ventricles of the brain. |
| <i>HYDIN</i> :<br>NM_001270974:exo<br>n12:c.G1466A:p.Gly<br>489Asp (h)   | rs6204031<br>8  | 104 | 87  | 22  | 99 | 15057  | -   | -     | -  | -      |                                                                                                                                                                                                                                                                                                                                                                                                                                                                                                                                                                                                                                                                                                                                                                                                                                                                                                                                                                                                                                                                                                                                                                                      |
| <i>HYDIN</i> :<br>NM_001270974:exo<br>n69:c.G11695A:p.Val<br>3899Met (h) | rs1626593       | 117 | 92  | 31  | 99 | 2872   | -   | -     | -  | -      |                                                                                                                                                                                                                                                                                                                                                                                                                                                                                                                                                                                                                                                                                                                                                                                                                                                                                                                                                                                                                                                                                                                                                                                      |
| <i>NUP160</i> :<br>NM_015231:exon19:<br>c.G2407A:p.Glu803L<br>ys (h)     | rs7756372<br>17 | 165 | 82  | 87  | 99 | 5613.4 | 2   | 1E+05 | 0  | #####  | Polyphen: benign; SIFT: TOLERATED; PROVEAN: Neutral; MutationTaster: disease causing (p.Glu803Lys). Polyphen: N/A; SIFT: N/A; PROVEAN: Deleterious; MutationTaster: disease causing (p.Arg1173X). This compound heterozygote is in trans. Substitution is inherited from Father and nonsense SNV from Mother. Substitution is present only as a heterozygote in Sister. The <i>NUP160</i> gene encodes Nup160 protein localized to the basket side of the nuclear pore, facing the nucleoplasm. Nup160 forms part of the Nup160-Nup107 subcomplex in the nuclear pore which is composed of Nup133, Nup96, Nup85, Nup43,                                                                                                                                                                                                                                                                                                                                                                                                                                                                                                                                                              |



|                                                                     |   |    |    |    |    |        |   |   |   |   |                                                                                                                                                                                                                                                                                                                                                                                                                                                                                                                                                                                                                                                                                                                                                                                                                               |
|---------------------------------------------------------------------|---|----|----|----|----|--------|---|---|---|---|-------------------------------------------------------------------------------------------------------------------------------------------------------------------------------------------------------------------------------------------------------------------------------------------------------------------------------------------------------------------------------------------------------------------------------------------------------------------------------------------------------------------------------------------------------------------------------------------------------------------------------------------------------------------------------------------------------------------------------------------------------------------------------------------------------------------------------|
| <i>NUP160</i> :<br>NM_015231:exon30:<br>c.C3517T:p.Arg1173<br>X (h) | - | 72 | 37 | 36 | 99 | 1762.3 | - | - | - | - | Nup37, Sec13, and Seh1. This complex plays a role in RNA export and in tethering Nup98 and Nup153 to the nucleus. Nup160 contains a histidine acid phosphatase motif. The N-terminal beta-propeller regions of Nup160 and Nup155 interact individually with an N-terminal domain of the nuclear pore membrane protein POM121, which lies close to the nuclear membrane. The <i>NUP160</i> gene is expressed in both human and mouse kidney cells. <sup>2</sup> Knockdown of <i>NUP160</i> impairs mouse podocytes in cell culture (PMID: 29704630). Two compound-heterozygous mutations (p.Glu803Lys and p.Arg910X) in <i>NUP160</i> were discovered in two siblings, older brother with steroid-resistant nephrotic syndrome and younger sister with proteinuria, from a non-consanguineous Chinese family (PMID: 30179222). |
|---------------------------------------------------------------------|---|----|----|----|----|--------|---|---|---|---|-------------------------------------------------------------------------------------------------------------------------------------------------------------------------------------------------------------------------------------------------------------------------------------------------------------------------------------------------------------------------------------------------------------------------------------------------------------------------------------------------------------------------------------------------------------------------------------------------------------------------------------------------------------------------------------------------------------------------------------------------------------------------------------------------------------------------------|

dbSNP151 (<https://www.ncbi.nlm.nih.gov/SNP/>); DP, read depth in target region; Nref, read depth for reference allele; Nalt, read depth for alternative allele; ExAC - The Exome Aggregation Consortium (<http://exac.broadinstitute.org/>); H, homozygous; h, heterozygous. 1 - Additional information obtained from GeneCards (<http://www.genecards.org/>), Mouse Genome Informatics (<http://www.informatics.jax.org/>) and The Human Protein Atlas (<http://www.proteinatlas.org/>); Polyphen (<http://genetics.bwh.harvard.edu/pph2/>); SIFT ([http://sift.jcvi.org/www/SIFT\\_enst\\_submit.html](http://sift.jcvi.org/www/SIFT_enst_submit.html)); PROVEAN ([http://provean.jcvi.org/seq\\_submit.php](http://provean.jcvi.org/seq_submit.php)); MutationTaster (<http://www.mutationtaster.org/>); N/A, no applicable. All variants were found through exome analysis. Compound heterozygous mutations (p.Glu803Lys and p.Arg1173X) in *NUP160* were checked with Sanger sequencing. 2 - <https://proteomescout.wustl.edu/proteins/57894/expression>.

## Supplemental Figure 1

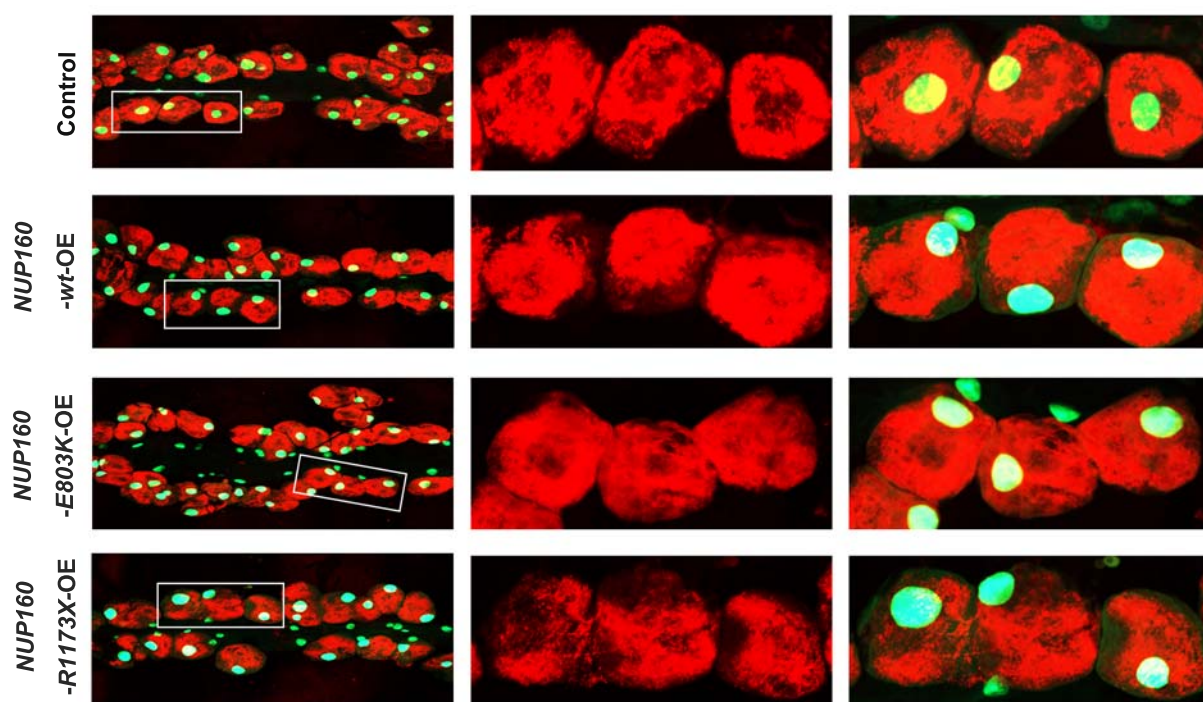

Supplement: ASN.2018080786SupplementaryData.pdf [file ASN.2018080786SupplementaryData.pdf]
